# Supplementary material for: Knowledge and attitudes toward recreational cannabis legalization among California residents: a population-matched questionnaire about Proposition 64
Source: Springer Nature journal article supplement (doi:10.1186/s42238-025-00304-9), 2025-07-12
Supplement: MOESM3 [file 42238_2025_304_MOESM3_ESM-1.pdf]

## Initial Screener Questionnaire

### S0Industry

Do you or does anyone in your household work in any of the following types of businesses or occupations? Please select all that apply.

| Opt. # | Option Text                  |
|--------|------------------------------|
| 1      | Advertising/Public Relations |
| 2      | Financial Services           |
| 3      | Food/Beverage                |
| 4      | Marketing/Marketing Research |
| 5      | Real Estate/Construction     |
| 6      | Sales/Sales Promotion        |
| 7      | Cannabis Industry            |
| 8      | None of the above            |

### S1aZipCode

What is your residential zip code?

### S1bState

In which state do you live?

| Opt. # | Option Text          |
|--------|----------------------|
| 1      | Alabama              |
| 2      | Alaska               |
| 3      | Arizona              |
| 4      | Arkansas             |
| 5      | California           |
| 6      | Colorado             |
| 7      | Connecticut          |
| 8      | Delaware             |
| 9      | District of Columbia |
| 10     | Florida              |
| 11     | Georgia              |
| 12     | Hawaii               |
| 13     | Idaho                |
| 14     | Illinois             |
| 15     | Indiana              |
| 16     | Iowa                 |
| 17     | Kansas               |
| 18     | Kentucky             |
| 19     | Louisiana            |

|    |                   |
|----|-------------------|
| 20 | Maine             |
| 21 | Maryland          |
| 22 | Massachusetts     |
| 23 | Michigan          |
| 24 | Minnesota         |
| 25 | Mississippi       |
| 26 | Missouri          |
| 27 | Montana           |
| 28 | Nebraska          |
| 29 | Nevada            |
| 30 | New Hampshire     |
| 31 | New Jersey        |
| 32 | New Mexico        |
| 33 | New York          |
| 34 | North Carolina    |
| 35 | North Dakota      |
| 36 | Ohio              |
| 37 | Oklahoma          |
| 38 | Oregon            |
| 39 | Pennsylvania      |
| 40 | Rhode Island      |
| 41 | South Carolina    |
| 42 | South Dakota      |
| 43 | Tennessee         |
| 44 | Texas             |
| 45 | Utah              |
| 46 | Vermont           |
| 47 | Virginia          |
| 48 | Washington        |
| 49 | West Virginia     |
| 50 | Wisconsin         |
| 51 | Wyoming           |
| 52 | Outside of the US |

**S2aAge**

What is your age?

**S3Gender**

What is your gender?

| Opt. # | Option Text               |
|--------|---------------------------|
| 1      | Male                      |
| 2      | Female                    |
| 3      | Genderqueer or non-binary |
| 4      | Agender                   |
| 5      | Not specified above       |
| 6      | Prefer not to answer      |

#### S4aHispanic

Are you of Spanish, Hispanic, or Latino background or origin? This includes Mexican, Mexican American, Puerto Rican, Cuban, and all other Spanish, Hispanic, or Latino origins.

| Opt. # | Option Text          |
|--------|----------------------|
| 1      | Yes                  |
| 2      | No                   |
| 3      | Prefer not to answer |

#### S4bRace

Are you...? Select all that apply.

| Opt. # | Option Text                     |
|--------|---------------------------------|
| 1      | White/Caucasian                 |
| 2      | Black/African American          |
| 3      | American Indian/Native American |
| 4      | Asian                           |
| 5      | Pacific Islander                |
| 6      | Some other race                 |
| 7      | Prefer not to answer            |

#### S5aPersonalIncome

What is your personal income (not including others in your household) before taxes?

| Opt. # | Option Text            |
|--------|------------------------|
| 1      | Less than \$25,000     |
| 2      | \$25,000 to \$49,999   |
| 3      | \$50,000 to \$74,999   |
| 4      | \$75,000 to \$99,999   |
| 5      | \$100,000 to \$124,999 |
| 6      | \$125,000 to \$149,999 |
| 7      | \$150,000 to \$249,999 |
| 8      | \$250,000 or more      |

**S5bHHIncome**

And what is your total annual household income (including others in your household) before taxes?

| Opt. # | Option Text            |
|--------|------------------------|
| 1      | Less than \$25,000     |
| 2      | \$25,000 to \$49,999   |
| 3      | \$50,000 to \$74,999   |
| 4      | \$75,000 to \$99,999   |
| 5      | \$100,000 to \$124,999 |
| 6      | \$125,000 to \$149,999 |
| 7      | \$150,000 to \$249,999 |
| 8      | \$250,000 or more      |

**D2HHSize**

How many people are living or staying at your current address? (Include yourself and any other adults or children who are living or staying at this address for at least two months)

| Opt. # | Option Text          |
|--------|----------------------|
| 1      | 1                    |
| 2      | 2                    |
| 3      | 3                    |
| 4      | 4                    |
| 5      | 5                    |
| 6      | 6                    |
| 7      | 7                    |
| 8      | 8 or more            |
| 9      | Prefer not to answer |

**D2aHHComposition**

And just to be sure I understand, thinking of who are living or staying at your current address, are any of them ... ?

| Opt. # | Option Text                                  |
|--------|----------------------------------------------|
| 1      | Under age 6                                  |
| 2      | 7 to 12 years old                            |
| 3      | 13 to 17 years old                           |
| 4      | My adult children age 18+                    |
| 5      | My parents or in-laws                        |
| 6      | Spouse or partner                            |
| 7      | My grandchildren                             |
| 8      | Grandparents                                 |
| 98     | Other family member (aunts, uncles, cousins) |

|    |                      |
|----|----------------------|
| 9  | Roommate(s)          |
| 99 | Prefer not to answer |

### D2bNumberKids

How many of those living in your household are children under the age of 18?

| Opt. # | Option Text          |
|--------|----------------------|
| 1      | 0                    |
| 2      | 1                    |
| 3      | 2                    |
| 4      | 3                    |
| 5      | 4                    |
| 6      | 5                    |
| 7      | 6 or more            |
| 8      | Prefer not to answer |

### S7Usage

Which of the following statements best describes you?

Please note: THC (tetrahydrocannabinol) is the substance in cannabis products that is responsible for the 'high' or 'stoned' feeling when using cannabis. Pure CBD products do not contain THC.

| Opt. # | Option Text                                                                                               |
|--------|-----------------------------------------------------------------------------------------------------------|
| 1      | I currently use or consume <b>cannabis that contains THC</b> (in any form)                                |
| 2      | I do not currently use or consume <b>cannabis that contains THC</b> (in any form), but I have in the past |
| 3      | I have never used or consumed <b>cannabis that contains THC</b> (in any form)                             |

### Ask if Current or Former User

#### S8LastConsumed

When was the last time you used or consumed cannabis that contains THC, in any form?

| Opt. # | Option Text                 |
|--------|-----------------------------|
| 1      | Today                       |
| 2      | Within the past week        |
| 3      | Within the past month       |
| 4      | Within the past 2-3 months  |
| 5      | Within the past 4-6 months  |
| 6      | Within the past 7-12 months |

|   |                         |
|---|-------------------------|
| 7 | More than 12 months ago |
|---|-------------------------|

### S9UseFrequency

**Ask Current Users (S7=1):** Approximately how often do you use or consume cannabis, in any form, that contains THC?

**Ask Past Users (S7=2):** Approximately how often did you use or consume cannabis, in any form, that contains THC in the past?

| Opt. # | Option Text              |
|--------|--------------------------|
| 1      | Multiple times a day     |
| 2      | Once a day               |
| 3      | 4-6 times a week         |
| 4      | 1-3 times a week         |
| 5      | 1-2 times a month        |
| 6      | Once every 2 to 3 months |
| 7      | Once every 4 to 6 months |
| 8      | Less than every 6 months |

Full questionnaire – Select questions related to knowledge and attitudes

**Q1AgeUse**

At what age did you start regularly/consistently using cannabis?

**Q56ChangeTravel**

How has the distance you travel to obtain cannabis changed since it became legal to possess/use in California in 2018?

Since it became legal to possess/use in California in 2018:

| Opt. # | Option Text                                   |
|--------|-----------------------------------------------|
| 1      | I travel longer distances to obtain cannabis  |
| 2      | I travel shorter distances to obtain cannabis |
| 3      | I travel the same distance to obtain cannabis |
| 4      | I switched to delivery                        |

**Q58SafetyAfter**

Since it became legal to possess/use in California in 2018, have you felt a change in how you feel about **your physical/personal safety** when it comes to obtaining cannabis?

| Opt. # | Option Text      |
|--------|------------------|
| 1      | I feel safer     |
| 2      | I feel less safe |
| 3      | No change        |

**Q33Familiarity**

Type: Radio

How familiar are you with Prop 64, the law that legalized recreational use of cannabis in California in 2016?

| Opt. # | Option Text                                    |
|--------|------------------------------------------------|
| 1      | Very familiar                                  |
| 2      | Somewhat familiar                              |
| 3      | Have heard of it, but don't know much about it |
| 4      | Have never heard of it                         |

**Q37InfluencedUse**

How did Prop 64 influence your own use of cannabis?

| Opt. # | Option Text                                                                  |
|--------|------------------------------------------------------------------------------|
| 1      | It made it <b>much more likely</b> for me to use cannabis                    |
| 2      | It made it <b>somewhat more likely</b> for me to use cannabis                |
| 3      | It made it <b>neither more likely nor less likely</b> for me to use cannabis |

|   |                                                               |
|---|---------------------------------------------------------------|
| 4 | It made it <b>somewhat less likely</b> for me to use cannabis |
| 5 | It made it <b>much less likely</b> for me to use cannabis     |

#### Q41Knowledge

Which of the following are **TRUE** regarding Prop 64? Select all that apply.

| Opt. # | Option Text                                                                                      |
|--------|--------------------------------------------------------------------------------------------------|
| 1      | It's legal to smoke cannabis in the car as a passenger                                           |
| 2      | You can get a DUI for driving under the influence of cannabis                                    |
| 3      | Individual cities can set their own regulations regarding driving after using cannabis           |
| 4      | Any container of cannabis inside a moving vehicle must be unopened and sealed, just like alcohol |
| 99     | None of the above                                                                                |

#### Q44Amount\_Different

Under the Prop 64 law, how many grams of each type of cannabis can you legally carry on your person?

Medical cannabis: \_\_\_\_\_grams

Recreational cannabis: \_\_\_\_\_grams

- Not Sure

#### Q47Age\_Different

Under the Prop 64 law, what is the legal age for using each type of cannabis?

Medical cannabis: \_\_\_\_\_years-old

Recreational cannabis: \_\_\_\_\_years-old

- Not Sure

#### Q48aPlacesLegal

Under the Prop 64 law, where is it **legal** to use/consume cannabis? Select all that you feel to be legal; please do not select an item if you are not sure whether or not it is legal.

| Opt. # | Option Text                                              |
|--------|----------------------------------------------------------|
| 1      | Your home                                                |
| 2      | Someone else's home                                      |
| 3      | Outdoor public space                                     |
| 4      | Restaurant                                               |
| 5      | Indoor public spaces, like museums and schools           |
| 6      | In the presence of children under 18                     |
| 7      | In the same places where it is legal to smoke cigarettes |

|    |                   |
|----|-------------------|
| 99 | None of the above |
|----|-------------------|

#### Q48bPlacesNotLegal

Under the Prop 64 law, where is it **not legal** to use/consume cannabis? Select all that you feel are not legal; please do not select an item if you are not sure whether or not it is legal.

| Opt. # | Option Text                                              |
|--------|----------------------------------------------------------|
| 1      | Your home                                                |
| 2      | Someone else's home                                      |
| 3      | Outdoor public space                                     |
| 4      | Restaurant                                               |
| 5      | Indoor public spaces, like museums and schools           |
| 6      | In the presence of children under 18                     |
| 7      | In the same places where it is legal to smoke cigarettes |
| 99     | None of the above                                        |

#### Q50Awareness1

Which of the following are you aware are legal for adults 21+ under the Prop 64 law? Select all that apply.

| Opt. # | Option Text                                                                                                                                                          |
|--------|----------------------------------------------------------------------------------------------------------------------------------------------------------------------|
| 1      | Possess 1 ounce or less of recreational cannabis and a quarter of an ounce or less of cannabis concentrate                                                           |
| 2      | Use cannabis on private property, but not in public places, such as bars or restaurants                                                                              |
| 3      | Give away 1 ounce or less of recreational cannabis and a quarter of an ounce or less of cannabis concentrate to other adults 21 years and older without compensation |
| 4      | Transport 1 ounce or less of recreational cannabis and a quarter of an ounce or less of cannabis concentrate cannabis in the trunk of the vehicle                    |
| 99     | None of the above                                                                                                                                                    |

#### Q51Awareness2

Which of the following are you aware that are true under the Prop 64 law? Select all that apply.

| Opt. # | Option Text                                                                                                                                                                                                               |
|--------|---------------------------------------------------------------------------------------------------------------------------------------------------------------------------------------------------------------------------|
| 1      | A person cannot smoke cannabis in places where it is illegal to smoke tobacco                                                                                                                                             |
| 2      | Drivers and passengers cannot smoke or ingest cannabis products in a moving vehicle                                                                                                                                       |
| 3      | Prop 64 does not decriminalize cannabis use for minors, but it does reduce the maximum penalty for most cannabis-related offenses to an infraction (except for manufacturing and driving under the influence of cannabis) |
| 4      | A person currently serving a sentence for a conviction of an eligible cannabis-related offense may petition the court for resentencing or dismissal of eligible convictions                                               |
| 99     | None of the above                                                                                                                                                                                                         |

#### Q52aCannabisPerceptionsAgree

Please select the statements about cannabis that you, personally, **strongly agree with**.

## Randomize

| Opt. # | Option Text                                                                          |
|--------|--------------------------------------------------------------------------------------|
| 1      | Cannabis should be legal to use in places where smoking is allowed                   |
| 2      | Cannabis should be legal to use in more public places                                |
| 3      | The federal government should legalize cannabis in all states                        |
| 4      | Cannabis use will lead to the use of other drugs                                     |
| 5      | Legalizing cannabis will lead to increased use by minors                             |
| 6      | Using cannabis during pregnancy is safe                                              |
| 7      | Smoking cannabis will lead to or worsen lung and breathing problems                  |
| 8      | Using cannabis will result in use that one can't stop                                |
| 9      | The legalization of cannabis improved the safety of cannabis products                |
| 10     | The legalization of cannabis improved personal safety when making cannabis purchases |
| 11     | Creating new variations and new methods to consume it is a positive trend            |
| 99     | None of the above                                                                    |

### Q61SpendFrequency

How has Prop 64 impacted the amount of money you spend on cannabis each month?

| Opt. # | Option Text              |
|--------|--------------------------|
| 1      | Spending more            |
| 2      | Spending less            |
| 3      | Spending the same amount |

### Q63aUseFrequencyMedicinal

How has **Prop 64** impacted how frequently you use **medicinal** cannabis?

| Opt. # | Option Text                                 |
|--------|---------------------------------------------|
| 1      | I use medicinal cannabis more often         |
| 2      | I use medicinal cannabis less often         |
| 3      | I use medicinal cannabis as often as before |

### Q63bUseFrequency

How has **Prop 64** impacted how frequently you use **recreational** cannabis?

| Opt. # | Option Text                                    |
|--------|------------------------------------------------|
| 1      | I use recreational cannabis more often         |
| 2      | I use recreational cannabis less often         |
| 3      | I use recreational cannabis as often as before |

### D1Marital

What is your marital status?

| Opt. # | Option Text           |
|--------|-----------------------|
| 1      | Single, never married |
| 2      | Living with partner   |
| 3      | Married               |
| 4      | Widowed               |
| 5      | Divorced/Separated    |
| 6      | Prefer not to answer  |

### D3Education

What is the highest degree or level of school you have completed?

| Opt. # | Option Text                                              |
|--------|----------------------------------------------------------|
| 1      | Less than 9th grade                                      |
| 2      | 9th to 12th grade, no diploma                            |
| 3      | Regular High School Diploma                              |
| 4      | GED or alternative credential                            |
| 5      | Occupational trade program                               |
| 6      | Some college credit, but no degree                       |
| 7      | Associate's degree (for example: AA, AS)                 |
| 8      | Bachelor's degree (for example: BA, BS)                  |
| 9      | Master's degree (for example: MA, MS, MEng, MEd, MBA)    |
| 10     | Professional degree (for example: MD, DDS, DVM, LLB, JD) |
| 11     | Doctorate degree (for example: PhD, EdD)                 |

### D4Employment

Which of the following best describes your current employment status?

| Opt. # | Option Text                 |
|--------|-----------------------------|
| 1      | Employed – full-time        |
| 2      | Employed – part-time        |
| 3      | Self-Employed – full-time   |
| 4      | Self-Employed – part-time   |
| 5      | Retired                     |
| 6      | Student – full-time         |
| 7      | Student – part-time         |
| 8      | Military                    |
| 9      | Full-time parent, homemaker |
| 10     | Not currently employed      |
| 11     | Prefer not to answer        |
